# Supplementary material
Source: MDPI journal article supplement (https://www.mdpi.com/search?q=molecules-26-00494)
Supplement: s001 [file molecules-26-00494-s001.pdf]

Supplementary Material

# Flavonoid Glycosides in *Brassica* Species Respond to UV-B Dependence on Exposure Time and Adaptation Time

Susanne Neugart <sup>1,\*</sup> and Christiane Bumke-Vogt <sup>2</sup>

<sup>1</sup> Division Quality and Sensory of Plant Products, Georg-August-Universität Göttingen, Carl-SPrengel-Weg 1, D-37075 Goettingen, Germany

<sup>2</sup> Leibniz-Institute of Vegetable and Ornamental Crops, Theodor-Echtermeyer-Weg 1, 14979 Grossbeeren, Germany; bumke@igzev.de

\* Correspondence: susanne.neugart@uni-goettingen.de; Tel: +49-0551-39-27958

Table S1: Kaempferol diglycosides of different *Brassica* species in  $\mu\text{g/g}$  DW. Asterix indicate differences due to the UV-B treatment at the certain time point significant at \*  $p \leq 0.05$ , \*\*  $p \leq 0.01$ , \*\*\*  $p \leq 0.005$

K: kaempferol; soph: sophorose; glc: glucose; cou: coumaroyl; caf: caffeoyl; fer: feruloyl; hfer: hydroxyferuloyl; sin: sinapoyl; h: hour; cond: condition

| <i>Brassica</i> |       |          | K-3-soph | K-3-cou-soph | K-3-caf-soph | K-3-fer-soph | K-3-hfer-soph | K-3-sin-soph |
|-----------------|-------|----------|----------|--------------|--------------|--------------|---------------|--------------|
| <i>rapa</i>     | Day 1 | h        | n.d.     | n.d.         |              |              |               |              |
|                 |       | cond     |          |              | **           | **           |               |              |
|                 |       | h × cond |          |              |              |              | *             |              |
|                 | Day 4 | h        | n.d.     | n.d.         |              | *            |               | *            |
|                 |       | cond     |          |              |              |              |               |              |
|                 |       | h × cond |          |              |              |              |               |              |
|                 | Day 7 | h        | n.d.     | n.d.         |              |              |               | *            |
|                 |       | cond     |          |              |              | ***          |               |              |
|                 |       | h × cond |          |              |              |              |               |              |
| <i>nigra</i>    | Day 1 | h        | n.d.     | n.d.         | ***          | n.d.         |               | ***          |
|                 |       | cond     |          |              | **           |              | **            |              |

|                 |       |          |      |      |     |      |      |     |
|-----------------|-------|----------|------|------|-----|------|------|-----|
|                 |       | h × cond |      |      | *** |      |      |     |
|                 | Day 4 | h        | n.d. | n.d. | *** | n.d. |      |     |
|                 |       | cond     |      |      |     |      |      | *   |
|                 |       | h × cond |      |      |     |      |      |     |
|                 | Day 7 | h        | n.d. | n.d. |     | n.d. | *    | *** |
|                 |       | cond     |      |      |     |      |      |     |
| <i>oleracea</i> | Day 1 | h × cond |      |      |     |      |      |     |
|                 |       | h        | n.d. | n.d. |     | n.d. |      |     |
|                 |       | cond     |      |      |     |      |      |     |
|                 |       | h × cond |      |      |     |      |      |     |
|                 | Day 4 | h        | n.d. | n.d. | **  | n.d. |      | *   |
|                 |       | cond     |      |      |     |      |      |     |
|                 |       | h × cond |      |      |     |      |      |     |
|                 | Day 7 | h        | n.d. | n.d. | *** | n.d. |      |     |
|                 |       | cond     |      |      |     |      | **   |     |
|                 |       | h × cond |      |      | *** |      |      |     |
| <i>juncea</i>   | Day 1 | h        | n.d. | n.d. |     |      | n.d. |     |
|                 |       | cond     |      |      | *   |      |      |     |
|                 |       | h × cond |      |      |     |      |      | *   |
|                 | Day 4 | h        | n.d. | n.d. |     | *    | n.d. |     |
|                 |       | cond     |      |      |     |      |      |     |
|                 |       | h × cond |      |      | *   |      |      |     |
|                 | Day 7 | h        | n.d. | n.d. |     |      | n.d. |     |
|                 |       | cond     |      |      |     |      |      |     |
|                 |       | h × cond |      |      |     |      |      | *** |
| <i>napus</i>    | Day 1 | h        | n.d. | ***  |     |      | n.d. |     |
|                 |       | cond     |      |      |     |      |      |     |
|                 |       | h × cond |      |      |     |      |      |     |
|                 | Day 4 | h        | n.d. |      |     |      | n.d. |     |
|                 |       | cond     |      |      |     |      |      |     |

|                 |       |          |      |      |   |      |      |     |
|-----------------|-------|----------|------|------|---|------|------|-----|
| <i>carinata</i> | Day 7 | h × cond |      |      |   |      |      |     |
|                 |       | h        | n.d. | *    | * | ***  | n.d. |     |
|                 |       | cond     |      |      |   |      |      |     |
|                 | Day 1 | h × cond |      |      |   |      |      |     |
|                 |       | h        | n.d. | n.d. |   | n.d. |      | *   |
|                 |       | cond     |      |      |   |      | *    | *** |
|                 | Day 4 | h × cond |      |      |   |      |      |     |
|                 |       | h        | n.d. | n.d. |   | n.d. |      |     |
|                 |       | cond     |      |      | * |      | *    |     |
|                 | Day 7 | h × cond |      |      |   |      |      |     |
|                 |       | h        | n.d. | n.d. |   | n.d. |      |     |
|                 |       | cond     |      |      |   |      |      |     |
| h × cond        |       |          |      |      |   |      | ***  |     |

Table S2: Quercetin diglycosides of different *Brassica* species in  $\mu\text{g/g}$  DW. Asterix indicate differences due to the UV-B treatment at the certain time point significant at \*  $p \leq 0.05$ , \*\*  $p \leq 0.01$ , \*\*\*  $p \leq 0.005$

Q: quercetin; soph: sophorose; glc: glucose; cou: coumaroyl; caf: caffeoyl; fer: feruloyl; hfer: hydroxyferuloyl; sin: sinapoyl; h: hour; cond: condition

| <i>Brassica</i> |       |      | Q-3-soph | Q-3-cou-soph | Q-3-caf-soph | Q-3-fer-soph | Q-3-hfer-soph | Q-3-sin-soph |
|-----------------|-------|------|----------|--------------|--------------|--------------|---------------|--------------|
| <i>rapa</i>     | Day 1 | h    | n.d.     | n.d.         | n.d.         | n.d.         |               | n.d.         |
|                 |       | cond |          |              |              |              |               |              |
|                 | Day 4 | h    | n.d.     | n.d.         | n.d.         | n.d.         |               | n.d.         |
|                 |       | cond |          |              |              |              |               |              |
|                 | Day 7 | h    | n.d.     | n.d.         | n.d.         | n.d.         |               | n.d.         |
|                 |       | cond |          |              |              |              |               |              |
| <i>nigra</i>    | Day 1 | h    | n.d.     | n.d.         | n.d.         | n.d.         |               | n.d.         |
|                 |       | cond |          |              |              |              |               |              |
|                 | Day 4 | h    | n.d.     | n.d.         | n.d.         | n.d.         |               | n.d.         |
|                 |       | cond |          |              |              |              |               |              |
|                 | Day 7 | h    | n.d.     | n.d.         | n.d.         | n.d.         |               | n.d.         |
|                 |       | cond |          |              |              |              |               |              |
| <i>oleracea</i> | Day 1 | h    | n.d.     | n.d.         | n.d.         | n.d.         | n.d.          |              |
|                 |       | cond |          |              |              |              |               |              |
|                 | Day 4 | h    | n.d.     | n.d.         | n.d.         | n.d.         | n.d.          | *            |
|                 |       | cond |          |              |              |              |               |              |
|                 | Day 7 | h    | n.d.     | n.d.         | n.d.         | n.d.         | n.d.          |              |
|                 |       | cond |          |              |              |              |               |              |

|                 |       |          |      |      |      |      |      |      |
|-----------------|-------|----------|------|------|------|------|------|------|
|                 |       | cond     |      |      |      |      |      | *    |
| <i>juncea</i>   | Day 1 | h × cond |      |      |      |      |      |      |
|                 |       | h        | n.d. | n.d. | n.d. | n.d. |      |      |
|                 | Day 4 | cond     |      |      |      |      |      |      |
|                 | Day 4 | h × cond |      |      |      |      |      |      |
|                 |       | h        | n.d. | n.d. | n.d. | n.d. |      |      |
|                 | Day 7 | cond     |      |      |      |      |      |      |
|                 |       | h × cond |      |      |      |      |      |      |
| <i>napus</i>    | Day 1 | h        | n.d. | n.d. | n.d. | n.d. |      | n.d. |
|                 |       | cond     |      |      |      |      |      |      |
|                 | Day 4 | h × cond |      |      |      |      |      |      |
|                 | Day 4 | h        | n.d. | n.d. | n.d. | n.d. |      | n.d. |
|                 |       | cond     |      |      |      |      |      |      |
|                 | Day 7 | h × cond |      |      |      |      |      |      |
|                 |       | h        | n.d. | n.d. | n.d. | n.d. |      | n.d. |
| <i>carinata</i> | Day 1 | cond     |      |      |      |      |      |      |
|                 |       | h × cond |      |      |      |      | n.d. | n.d. |
|                 | Day 4 | h        | n.d. | n.d. | n.d. | n.d. | n.d. | n.d. |
|                 | Day 7 | cond     |      |      |      |      |      |      |
|                 |       | h × cond |      |      |      |      |      |      |
|                 | Day 7 | h        | n.d. | n.d. | n.d. | n.d. | n.d. | n.d. |
|                 |       | cond     |      |      |      |      |      |      |
|                 |       | h × cond |      |      |      |      |      |      |

Table S3: Kaempferol triglycosides of different *Brassica* species in  $\mu\text{g/g}$  DW. Asterix indicate differences due to the UV-B treatment at the certain time point significant at \*  $p \leq 0.05$ , \*\*  $p \leq 0.01$ , \*\*\*  $p \leq 0.005$

K: kaempferol; soph: sophoroside; glc: glucose; cou: coumaroyl; caf: caffeoyl; fer: feruloyl; hfer: hydroxyferuloyl; sin: sinapoyl; h: hour; cond: condition

| <i>Brassica</i> |       |          | K-<br>3-<br>soph-<br>7-glc | K-<br>3-cou-<br>soph-<br>7-glc | K-<br>3-caf-<br>soph-<br>7-glc | K-<br>3-fer-<br>soph-<br>7-glc | K-<br>3-hfer-<br>soph-<br>7-glc | K-<br>3-sin-<br>soph-<br>7-glc | K-<br>3-disin-<br>soph-<br>7-glc | K-<br>3-sin,fer-<br>soph-<br>7-glc |      |
|-----------------|-------|----------|----------------------------|--------------------------------|--------------------------------|--------------------------------|---------------------------------|--------------------------------|----------------------------------|------------------------------------|------|
| <i>rapa</i>     | Day 1 | h        |                            |                                |                                |                                |                                 |                                |                                  |                                    |      |
|                 |       | cond     |                            |                                |                                |                                |                                 |                                |                                  |                                    |      |
|                 |       | h × cond |                            |                                |                                |                                |                                 |                                |                                  |                                    |      |
|                 | Day 4 | h        |                            | **                             |                                |                                | *                               |                                | **                               |                                    |      |
|                 |       | cond     |                            |                                | *                              |                                |                                 |                                |                                  |                                    |      |
|                 |       | h × cond |                            |                                |                                |                                |                                 |                                |                                  |                                    |      |
|                 | Day 7 | h        |                            |                                |                                |                                | *                               |                                |                                  |                                    |      |
|                 |       | cond     |                            |                                |                                |                                |                                 |                                |                                  |                                    |      |
|                 |       | h × cond |                            |                                |                                |                                |                                 |                                |                                  |                                    |      |
| <i>nigra</i>    | Day 1 | h        |                            |                                |                                | *                              | *                               |                                | n.d.                             | n.d.                               |      |
|                 |       | cond     |                            |                                |                                |                                |                                 |                                |                                  |                                    |      |
|                 |       | h × cond |                            |                                |                                |                                |                                 |                                |                                  |                                    |      |
|                 | Day 4 | h        |                            | ***                            |                                |                                |                                 |                                |                                  | n.d.                               | n.d. |
|                 |       | cond     |                            | *                              |                                |                                |                                 |                                |                                  |                                    |      |
|                 |       | h × cond |                            |                                |                                |                                |                                 |                                |                                  |                                    |      |
|                 | Day 7 | h        |                            |                                |                                |                                | *                               |                                |                                  | n.d.                               | n.d. |
|                 |       | cond     |                            |                                |                                |                                |                                 |                                |                                  |                                    |      |
|                 |       | h × cond |                            |                                |                                |                                |                                 |                                |                                  |                                    |      |
| <i>oleracea</i> | Day 1 | h        |                            |                                |                                |                                |                                 |                                | ***                              | ***                                |      |
|                 |       | cond     |                            |                                |                                |                                |                                 |                                |                                  |                                    |      |
|                 |       | h × cond |                            |                                |                                | *                              |                                 |                                |                                  |                                    |      |

|               |          |          |     |     |     |     |     |      |      |      |
|---------------|----------|----------|-----|-----|-----|-----|-----|------|------|------|
| <i>juncea</i> | Day 4    | h        | *** | *** | *** | *** | *** |      | **   | ***  |
|               |          | cond     | **  |     | *   | *** | *   | ***  |      |      |
|               |          | h × cond |     | **  | *   | *** | *** |      |      |      |
|               | Day 7    | h        |     |     |     |     |     |      |      |      |
|               |          | cond     |     | *** | **  | *** | *   | ***  |      | ***  |
|               |          | h × cond | *** |     |     |     |     |      |      |      |
|               | Day 1    | h        |     |     |     | *   |     |      |      |      |
|               |          | cond     |     | *   |     | *   |     |      |      |      |
|               |          | h × cond |     |     |     |     |     |      |      |      |
| Day 4         | h        |          | *   |     |     |     |     | ***  |      |      |
|               | cond     |          |     |     |     |     |     |      |      |      |
|               | h × cond |          |     |     |     |     |     |      |      |      |
| Day 7         | h        |          |     |     |     |     |     | ***  |      |      |
|               | cond     | *        | *   |     |     |     |     | *    |      |      |
|               | h × cond |          |     |     |     |     |     |      |      |      |
| Day 1         | h        |          |     | *** |     | *** |     | n.d. | n.d. |      |
|               | cond     |          |     |     |     |     |     |      |      |      |
|               | h × cond |          |     |     |     |     |     |      |      |      |
| Day 4         | h        |          |     |     |     |     |     | ***  | n.d. | n.d. |
|               | cond     |          |     | *   |     |     |     |      |      |      |
|               | h × cond |          |     |     |     |     |     |      | n.d. | n.d. |
| Day 7         | h        |          |     |     |     |     |     |      |      |      |
|               | cond     |          |     |     |     |     |     |      |      |      |
|               | h × cond |          |     |     |     |     |     |      |      |      |
| Day 1         | h        | *        |     |     |     |     |     |      |      |      |
|               | cond     |          |     |     |     |     |     |      |      |      |

|       |          |   |   |     |     |      |      |
|-------|----------|---|---|-----|-----|------|------|
| Day 4 | h × cond |   |   | *   |     |      |      |
|       | h        |   | * | *** |     | n.d. | n.d. |
|       | cond     | * | * | *** |     |      |      |
| Day 7 | h × cond | * | * |     |     |      |      |
|       | h        |   | * |     | *** | n.d. | n.d. |
|       | cond     |   |   |     |     |      |      |
|       | h × cond |   |   |     |     |      |      |



Table S4: Quercetin triglycosides of different *Brassica* species in  $\mu\text{g/g}$  DW. Asterix indicate differences due to the UV-B treatment at the certain time point significant at \*  $p \leq 0.05$ , \*\*  $p \leq 0.01$ , \*\*\*  $p \leq 0.005$

Q: quercetin; soph: 9inapoyl9; glc: glucose; cou: coumaroyl; caf: caffeoyl; fer: feruloyl; hfer: hydroxyferuloyl; sin: 9inapoyl; h: hour; cond: condition

| <i>Brassica</i> |          |          | Q-3-soph-<br>7-glc | Q-3-cou-<br>soph-7-<br>glc | Q-3-caf-<br>soph-7-<br>glc | Q-3-fer-<br>soph-7-<br>glc | Q-3-hfer-<br>soph-7-<br>glc | Q-3-sin-<br>soph-7-<br>glc |
|-----------------|----------|----------|--------------------|----------------------------|----------------------------|----------------------------|-----------------------------|----------------------------|
| <i>rapa</i>     | Day 1    | h        |                    | n.d.                       |                            | n.d.                       |                             |                            |
|                 |          | cond     |                    |                            |                            |                            |                             |                            |
|                 |          | h × cond | *                  |                            |                            |                            |                             |                            |
|                 | Day 4    | h        |                    | n.d.                       |                            | n.d.                       |                             | **                         |
|                 |          | cond     |                    |                            |                            |                            |                             |                            |
|                 |          | h × cond | *                  |                            |                            |                            |                             |                            |
| Day 7           | h        |          | n.d.               |                            | n.d.                       |                            |                             |                            |
|                 | cond     |          |                    |                            | *                          |                            |                             |                            |
|                 | h × cond |          |                    |                            |                            |                            |                             |                            |
| <i>nigra</i>    | Day 1    | h        |                    | n.d.                       | n.d.                       | n.d.                       | ***                         | n.d.                       |
|                 |          | cond     |                    |                            |                            |                            | **                          |                            |
|                 |          | h × cond |                    |                            |                            |                            | ***                         |                            |
|                 | Day 4    | h        |                    | n.d.                       | n.d.                       | n.d.                       |                             | n.d.                       |
|                 |          | cond     | *                  |                            |                            |                            |                             |                            |
|                 |          | h × cond |                    |                            |                            |                            |                             |                            |
| Day 7           | h        |          | n.d.               | n.d.                       | n.d.                       |                            | n.d.                        |                            |
|                 | cond     |          |                    |                            |                            |                            |                             |                            |
|                 | h × cond |          |                    |                            |                            |                            |                             |                            |
| <i>oleracea</i> | Day 1    | h        |                    | n.d.                       |                            | n.d.                       | n.d.                        | ***                        |
|                 |          | cond     |                    |                            |                            |                            |                             |                            |
|                 |          | h × cond |                    |                            |                            |                            |                             |                            |
|                 | Day 4    | h        | **                 | n.d.                       | ***                        | n.d.                       | n.d.                        | **                         |
| cond            |          |          |                    | ***                        |                            |                            |                             |                            |

|                 |       |                       |      |      |      |      |      |
|-----------------|-------|-----------------------|------|------|------|------|------|
|                 | Day 7 | h × cond<br>h<br>cond |      | ***  | n.d. | n.d. | ***  |
| <i>juncea</i>   | Day 1 | h × cond<br>h<br>cond | n.d. | *    | n.d. |      | n.d. |
|                 | Day 4 | h × cond<br>h<br>cond | n.d. |      | *    |      | n.d. |
|                 | Day 7 | h × cond<br>h<br>cond | n.d. |      | n.d. |      | n.d. |
| <i>napus</i>    | Day 1 | h × cond<br>h<br>cond | n.d. | n.d. | n.d. | n.d. | n.d. |
|                 | Day 4 | h × cond<br>h<br>cond | n.d. | n.d. | n.d. | n.d. | n.d. |
|                 | Day 7 | h × cond<br>h<br>cond | n.d. | n.d. | n.d. | n.d. | n.d. |
| <i>carinata</i> | Day 1 | h × cond<br>h<br>cond | n.d. |      | n.d. | ***  | ***  |
|                 | Day 4 | h × cond<br>h<br>cond | n.d. | n.d. | n.d. | *    | n.d. |
|                 | Day 7 | h × cond<br>h         | n.d. | n.d. | n.d. | n.d. | n.d. |

cond  
h × cond

Table S5: Kaempferol tetraglycosides of different *Brassica* species in  $\mu\text{g/g}$  DW. Asterix indicate differences due to the UV-B treatment at the certain time point significant at \*  $p \leq 0.05$ , \*\*  $p \leq 0.01$ , \*\*\*  $p \leq 0.005$

K: kaempferol; soph: 12inapoyl12; glc: glucose; cou: coumaroyl; caf: caffeoyl; fer: feruloyl; hfer: hydroxyferuloyl; sin: 12inapoyl; h: hour; cond: condition

| <i>Brassica</i> |       |          | K-3-soph-7-diglc | K-3-cou-soph-7-diglc | K-3-caf-soph-7-diglc | K-3-fer-soph-7-diglc | K-3-hfer-soph-7-diglc | K-3-sin-soph-7-diglc | K-3-disin-striglc-7-glc |
|-----------------|-------|----------|------------------|----------------------|----------------------|----------------------|-----------------------|----------------------|-------------------------|
| <i>rapa</i>     | Day 1 | h        | n.d.             | n.d.                 | n.d.                 | n.d.                 | n.d.                  | n.d.                 | n.d.                    |
|                 |       | cond     |                  |                      |                      |                      |                       |                      |                         |
|                 |       | h × cond |                  |                      |                      |                      |                       |                      |                         |
|                 | Day 4 | h        | n.d.             | n.d.                 | n.d.                 | n.d.                 | n.d.                  | n.d.                 | n.d.                    |
|                 |       | cond     |                  |                      |                      |                      |                       |                      |                         |
|                 |       | h × cond |                  |                      |                      |                      |                       |                      |                         |
|                 | Day 7 | h        | n.d.             | n.d.                 | n.d.                 | n.d.                 | n.d.                  | n.d.                 | n.d.                    |
|                 |       | cond     |                  |                      |                      |                      |                       |                      |                         |
|                 |       | h × cond |                  |                      |                      |                      |                       |                      |                         |
| <i>nigra</i>    | Day 1 | h        | n.d.             | n.d.                 | ***                  |                      |                       |                      | n.d.                    |
|                 |       | cond     |                  |                      |                      |                      |                       |                      |                         |
|                 |       | h × cond |                  |                      |                      |                      | **                    |                      |                         |
|                 | Day 4 | h        | n.d.             | n.d.                 | ***                  |                      | ***                   | ***                  | n.d.                    |
|                 |       | cond     |                  |                      |                      |                      |                       |                      |                         |
|                 |       | h × cond |                  |                      |                      |                      |                       |                      |                         |
|                 | Day 7 | h        | n.d.             | n.d.                 |                      | *                    |                       |                      | n.d.                    |
|                 |       | cond     |                  |                      |                      |                      |                       |                      |                         |
|                 |       | h × cond |                  |                      |                      |                      | *                     |                      |                         |
| <i>oleracea</i> | Day 1 | h        | n.d.             | n.d.                 | n.d.                 |                      | **                    |                      |                         |
|                 |       | cond     |                  |                      |                      |                      |                       |                      |                         |
|                 |       | h × cond |                  |                      |                      |                      |                       |                      |                         |
| Day 4           | h     | n.d.     | n.d.             | n.d.                 | *                    | ***                  | *                     | **                   |                         |

|                 |       |          |      |      |      |      |      |     |      |
|-----------------|-------|----------|------|------|------|------|------|-----|------|
|                 |       | cond     |      |      |      |      | *    |     | **   |
|                 |       | h × cond |      |      |      |      |      |     |      |
|                 | Day 7 | h        | n.d. | n.d. | n.d. |      | **   |     | *    |
|                 |       | cond     |      |      |      | ***  | ***  | *** | *    |
|                 |       | h × cond |      |      |      |      |      |     |      |
| <i>juncea</i>   | Day 1 | h        | n.d. | n.d. | n.d. |      | n.d. |     | n.d. |
|                 |       | cond     |      |      |      |      |      |     |      |
|                 |       | h × cond |      |      |      |      |      |     |      |
|                 | Day 4 | h        | n.d. | n.d. | n.d. |      | n.d. |     | n.d. |
|                 |       | cond     |      |      |      |      |      |     |      |
|                 |       | h × cond |      |      |      |      |      |     |      |
|                 | Day 7 | h        | n.d. | n.d. | n.d. |      | n.d. |     | n.d. |
|                 |       | cond     |      |      |      |      |      |     |      |
|                 |       | h × cond |      |      |      |      |      |     |      |
| <i>napus</i>    | Day 1 | h        | n.d. | n.d. | n.d. | ***  | *    |     |      |
|                 |       | cond     |      |      |      | *    |      |     |      |
|                 |       | h × cond |      |      |      | *    |      |     |      |
|                 | Day 4 | h        | n.d. | n.d. | n.d. | n.d. | ***  |     |      |
|                 |       | cond     |      |      |      |      |      |     |      |
|                 |       | h × cond |      |      |      |      |      |     |      |
|                 | Day 7 | h        | n.d. | n.d. |      | n.d. |      |     |      |
|                 |       | cond     |      |      |      |      |      |     |      |
|                 |       | h × cond |      |      |      |      |      |     | *    |
| <i>carinata</i> | Day 1 | h        | n.d. | n.d. | n.d. |      |      |     |      |
|                 |       | cond     |      |      |      |      |      |     |      |
|                 |       | h × cond |      |      |      |      |      |     |      |
|                 | Day 4 | h        | n.d. | n.d. | n.d. |      |      |     |      |
|                 |       | cond     |      |      |      |      |      |     |      |
|                 |       | h × cond |      |      |      |      |      |     |      |

Day 7

h

n.d.

n.d.

n.d.

\*\*\*

cond

\*

\*\*

h × cond

\*\*

Table S6: Quercetin tetraglycosides of different *Brassica* species in µg/g DW. Asterix indicate differences due to the UV-B treatment at the certain time point significant at \*  $p \leq 0.05$ , \*\*  $p \leq 0.01$ , \*\*\*  $p \leq 0.005$

Q: quercetin; soph: 15inapoyl15; glc: glucose; cou: coumaroyl; caf: caffeoyl; fer: feruloyl; hfer: hydroxyferuloyl; sin: 15inapoyl; h: hour; cond: condition

| <i>Brassica</i> |       |          | Q-3-soph-7-diglc | Q-3-cou-soph-7-diglc | Q-3-caf-soph-7-diglc | Q-3-fer-soph-7-diglc | Q-3-hfer-soph-7-diglc | Q-3-sin-soph-7-diglc | Q-3-disin-triglc-7-glc |
|-----------------|-------|----------|------------------|----------------------|----------------------|----------------------|-----------------------|----------------------|------------------------|
| <i>rapa</i>     | Day 1 | h        | n.d.             | n.d.                 | n.d.                 | n.d.                 | n.d.                  | n.d.                 | n.d.                   |
|                 |       | cond     |                  |                      |                      |                      |                       |                      |                        |
|                 |       | h × cond |                  |                      |                      |                      |                       |                      |                        |
|                 | Day 4 | h        | n.d.             | n.d.                 | n.d.                 | n.d.                 | n.d.                  | n.d.                 | n.d.                   |
|                 |       | cond     |                  |                      |                      |                      |                       |                      |                        |
|                 |       | h × cond |                  |                      |                      |                      |                       |                      |                        |
|                 | Day 7 | h        | n.d.             | n.d.                 | n.d.                 | n.d.                 | n.d.                  | n.d.                 | n.d.                   |
|                 |       | cond     |                  |                      |                      |                      |                       |                      |                        |
|                 |       | h × cond |                  |                      |                      |                      |                       |                      |                        |
| <i>nigra</i>    | Day 1 | h        | n.d.             | n.d.                 | n.d.                 | n.d.                 | n.d.                  | n.d.                 | n.d.                   |
|                 |       | cond     |                  |                      |                      |                      |                       |                      |                        |
|                 |       | h × cond |                  |                      |                      |                      |                       |                      |                        |
|                 | Day 4 | h        | n.d.             | n.d.                 | n.d.                 | n.d.                 | n.d.                  | n.d.                 | n.d.                   |
|                 |       | cond     |                  |                      |                      |                      |                       |                      |                        |
|                 |       | h × cond |                  |                      |                      |                      |                       |                      |                        |
|                 | Day 7 | h        | n.d.             | n.d.                 | n.d.                 | n.d.                 | n.d.                  | n.d.                 | n.d.                   |
|                 |       | cond     |                  |                      |                      |                      |                       |                      |                        |
|                 |       | h × cond |                  |                      |                      |                      |                       |                      |                        |
| <i>oleracea</i> | Day 1 | h        | n.d.             | n.d.                 | n.d.                 | n.d.                 | n.d.                  |                      | *                      |
|                 |       | cond     |                  |                      |                      |                      |                       |                      |                        |
|                 |       | h × cond |                  |                      |                      |                      |                       |                      |                        |
|                 | Day 4 | h        | n.d.             | n.d.                 | n.d.                 | n.d.                 | n.d.                  |                      | *                      |
|                 |       | cond     |                  |                      |                      |                      |                       |                      |                        |
|                 |       | h × cond |                  |                      |                      |                      |                       |                      |                        |

|                 |       |          |      |      |      |      |      |      |      |
|-----------------|-------|----------|------|------|------|------|------|------|------|
|                 |       | cond     |      |      |      |      |      | ***  |      |
|                 |       | h × cond |      |      |      |      |      |      |      |
|                 | Day 7 | h        | n.d. | n.d. | n.d. | n.d. | n.d. |      |      |
|                 |       | cond     |      |      |      |      |      | ***  |      |
|                 |       | h × cond |      |      |      |      |      |      |      |
| <i>juncea</i>   | Day 1 | h        | n.d. | n.d. | n.d. | n.d. | n.d. | n.d. | n.d. |
|                 |       | cond     |      |      |      |      |      |      |      |
|                 |       | h × cond |      |      |      |      |      |      |      |
|                 | Day 4 | h        | n.d. | n.d. | n.d. | n.d. | n.d. | n.d. | n.d. |
|                 |       | cond     |      |      |      |      |      |      |      |
|                 |       | h × cond |      |      |      |      |      |      |      |
|                 | Day 7 | h        | n.d. | n.d. | n.d. | n.d. | n.d. | n.d. | n.d. |
|                 |       | cond     |      |      |      |      |      |      |      |
|                 |       | h × cond |      |      |      |      |      |      |      |
| <i>napus</i>    | Day 1 | h        | n.d. | n.d. | n.d. | n.d. | n.d. | n.d. |      |
|                 |       | cond     |      |      |      |      |      |      |      |
|                 |       | h × cond |      |      |      |      |      |      |      |
|                 | Day 4 | h        | n.d. | n.d. | n.d. | n.d. | n.d. | n.d. |      |
|                 |       | cond     |      |      |      |      |      |      |      |
|                 |       | h × cond |      |      |      |      |      |      | *    |
|                 | Day 7 | h        | n.d. | n.d. | n.d. | n.d. | n.d. | n.d. |      |
|                 |       | cond     |      |      |      |      |      |      |      |
|                 |       | h × cond |      |      |      |      |      |      | *    |
| <i>carinata</i> | Day 1 | h        | n.d. | n.d. | n.d. | n.d. | n.d. | n.d. |      |
|                 |       | cond     |      |      |      |      |      |      |      |
|                 |       | h × cond |      |      |      |      |      |      |      |
|                 | Day 4 | h        | n.d. | n.d. | n.d. | n.d. | n.d. | n.d. |      |
|                 |       | cond     |      |      |      |      |      |      |      |
|                 |       | h × cond |      |      |      |      |      |      | *    |



Day 7

h

n.d.

n.d.

n.d.

n.d.

n.d.

n.d.

cond

h × cond

\*\*\*

Table S7: Quercetin tetraglycosides of different *Brassica* species in µg/g DW. Asterix indicate differences due to the UV-B treatment at the certain time point significant at \*  $p \leq 0.05$ , \*\*  $p \leq 0.01$ , \*\*\*  $p \leq 0.005$

Q: quercetin; soph: sinapoyl; glc: glucose; cou: coumaroyl; caf: caffeoyl; fer: feruloyl; hfer: hydroxyferuloyl; sin: sinapoyl; h: hour; cond: condition

| <i>Brassica</i> |       |          | Chl | Cou-<br>mal | Caf-mal | Fer-mal | Hfer-<br>mal | Sin-mal | Disin-<br>gent | Sin,fer-<br>gent | Trisin-<br>gent | Disin,fer-<br>gent |
|-----------------|-------|----------|-----|-------------|---------|---------|--------------|---------|----------------|------------------|-----------------|--------------------|
| <i>rapa</i>     | Day 1 | h        |     |             |         |         |              |         |                |                  |                 |                    |
|                 |       | cond     |     |             |         |         |              |         |                |                  |                 |                    |
|                 | Day 4 | h        |     |             | *       |         |              | ***     |                | *                |                 |                    |
|                 |       | cond     | *   |             |         |         | **           |         |                |                  |                 |                    |
|                 | Day 7 | h        |     |             |         |         |              |         |                |                  |                 | n.d.               |
|                 |       | cond     | *   |             |         |         | *            |         |                |                  |                 |                    |
| <i>nigra</i>    | Day 1 | h        | *** | n.d.        | n.d.    | n.d.    | n.d.         | n.d.    |                |                  |                 |                    |
|                 |       | cond     | *   |             |         |         |              |         |                |                  |                 |                    |
|                 | Day 4 | h        |     | n.d.        | n.d.    | n.d.    | n.d.         | n.d.    |                | *                |                 |                    |
|                 |       | cond     |     |             |         |         |              |         |                |                  |                 |                    |
|                 | Day 7 | h        |     | n.d.        | n.d.    | n.d.    | n.d.         | n.d.    |                |                  |                 |                    |
|                 |       | cond     |     |             |         |         |              |         |                | *                |                 |                    |
|                 |       | h × cond |     |             |         |         |              |         |                |                  | *               |                    |

|                 |       |                  |      |      |      |      |      |     |     |   |            |
|-----------------|-------|------------------|------|------|------|------|------|-----|-----|---|------------|
| <i>oleracea</i> | Day 1 | h                | n.d. | n.d. | n.d. | n.d. | n.d. | *   | *   | * | *          |
|                 |       | cond<br>h × cond |      |      |      |      |      |     |     |   |            |
|                 | Day 4 | h                | n.d. | n.d. | n.d. | n.d. | n.d. | *** | *** |   | ***        |
|                 |       | cond<br>h × cond |      |      |      |      |      |     |     | * | ***<br>*** |
|                 | Day 7 | h                | n.d. | n.d. | n.d. | n.d. | n.d. |     |     |   |            |
|                 |       | cond<br>h × cond |      |      |      |      |      |     |     | * |            |
| <i>juncea</i>   | Day 1 | h                |      | *    |      |      |      |     | *   |   |            |
|                 |       | cond<br>h × cond |      |      |      |      |      |     | *   |   |            |
|                 | Day 4 | h                |      |      |      |      |      |     |     |   |            |
|                 |       | cond<br>h × cond |      | ***  |      | **   |      | *   |     |   |            |
|                 | Day 7 | h                | *    |      | ***  |      | ***  | *** |     |   | n.d.       |
|                 |       | cond<br>h × cond |      |      |      |      |      |     |     |   |            |
| <i>napus</i>    | Day 1 | h                | *    | *    | ***  |      |      | *   |     |   |            |
|                 |       | cond<br>h × cond |      |      |      |      |      |     |     |   |            |
|                 | Day 4 | h                |      | *    | **   | ***  | ***  |     |     | * |            |
|                 |       | cond             |      | **   | *    | *    | ***  |     |     |   |            |

|                 |     |          |      |      |      |      |      |      |      |      |      |
|-----------------|-----|----------|------|------|------|------|------|------|------|------|------|
|                 |     |          |      |      |      |      |      |      |      |      |      |
|                 |     | h × cond |      |      |      |      |      |      |      |      |      |
|                 | Day | h        |      |      |      |      |      |      |      |      |      |
|                 | 7   |          |      |      |      |      |      |      |      |      |      |
|                 |     | cond     |      |      |      |      |      |      |      |      |      |
|                 |     | h × cond |      |      |      |      |      |      |      |      |      |
| <i>carinata</i> | Day | h        | n.d. | n.d. | n.d. | n.d. | n.d. | n.d. | n.d. | n.d. | n.d. |
|                 | 1   |          |      |      |      |      |      |      |      |      |      |
|                 |     | cond     |      |      |      |      |      |      |      |      |      |
|                 |     | h × cond |      |      |      |      |      |      |      |      |      |
|                 | Day | h        | n.d. | n.d. | n.d. | n.d. | n.d. | n.d. | n.d. | n.d. | n.d. |
|                 | 4   |          |      |      |      |      |      |      |      |      |      |
|                 |     | cond     |      |      |      |      |      |      |      |      |      |
|                 |     | h × cond |      |      |      |      |      |      |      |      |      |
|                 | Day | h        | n.d. | n.d. | n.d. | n.d. | n.d. | n.d. | n.d. | n.d. | n.d. |
|                 | 7   |          |      |      |      |      |      |      |      |      |      |
|                 |     | cond     | ***  |      |      |      |      |      |      |      |      |
|                 |     | h × cond | ***  |      |      |      |      |      |      |      |      |
